# Supplementary material for: Integrated characterisation of cancer genes identifies key molecular biomarkers in stomach adenocarcinoma
Source: PubMed Central journal article supplement — J Clin Pathol. 2020 Feb 7;73(9):579–86. doi: 10.1136/jclinpath-2019-206400 (PMC7476269; doi:10.1136/jclinpath-2019-206400), 2020-02-07
Supplement: jclinpath-2019-206400supp002.pdf [file jclinpath-2019-206400supp002.pdf]

Supplementary Table 1. multivariate analysis of 7 driver genes and various clinical characteristics with patients' mortality in STAD patients

| Variable                    | DNER |        | LHCGR |        | NLRP14 |        | OR4N2 |        | PSG6 |        | TTC29 |        | ZNF568 |        |
|-----------------------------|------|--------|-------|--------|--------|--------|-------|--------|------|--------|-------|--------|--------|--------|
|                             | OR   | Pvalue | OR    | Pvalue | OR     | Pvalue | OR    | Pvalue | OR   | Pvalue | OR    | Pvalue | OR     | Pvalue |
| Age                         | 1.13 | 0.00   | 1.13  | 0.00   | 1.11   | 0.01   | 1.12  | 0.01   | 1.13 | 0.00   | 1.14  | 0.00   | 1.12   | 0.00   |
| Gender                      | 2.48 | 0.24   | 2.97  | 0.17   | 2.74   | 0.19   | 2.81  | 0.19   | 2.76 | 0.18   | 2.80  | 0.19   | 2.74   | 0.22   |
| Pathologic stage            | 0.90 | 0.78   | 0.97  | 0.94   | 1.25   | 0.56   | 1.04  | 0.92   | 1.39 | 0.41   | 1.34  | 0.46   | 1.02   | 0.96   |
| Pathologic_t_stage          | 0.70 | 0.39   | 0.75  | 0.48   | 0.67   | 0.36   | 0.79  | 0.57   | 0.75 | 0.49   | 0.77  | 0.53   | 0.84   | 0.69   |
| Pathologic_n_stage          | 1.69 | 0.31   | 1.35  | 0.56   | 1.28   | 0.62   | 1.09  | 0.87   | 1.24 | 0.64   | 1.36  | 0.54   | 1.00   | 1.00   |
| Pathologic_m_stage          | 2.50 | 0.48   | 2.13  | 0.60   | 1.49   | 0.77   | 3.68  | 0.34   | 1.98 | 0.59   | 2.24  | 0.55   | 0.81   | 0.88   |
| Number positive lymph nodes | 0.95 | 0.50   | 0.96  | 0.65   | 0.98   | 0.80   | 0.98  | 0.81   | 1.00 | 0.98   | 0.98  | 0.72   | 1.02   | 0.83   |
| Radiation therapy           | 1.85 | 0.48   | 2.19  | 0.38   | 3.02   | 0.22   | 1.85  | 0.49   | 2.25 | 0.36   | 1.78  | 0.52   | 3.32   | 0.19   |
| Targeted molecular therapy  | 1.52 | 0.58   | 1.09  | 0.91   | 1.15   | 0.85   | 1.28  | 0.74   | 1.34 | 0.69   | 1.20  | 0.80   | 1.43   | 0.66   |
| Microsatellite instability  | 1.87 | 0.12   | 1.58  | 0.24   | 1.83   | 0.13   | 1.45  | 0.33   | 1.65 | 0.18   | 1.65  | 0.18   | 2.62   | 0.04   |
| Gene                        | 4.51 | 0.04   | 5.44  | 0.02   | 6.10   | 0.02   | 4.60  | 0.03   | 5.36 | 0.05   | 5.16  | 0.02   | 14.75  | 0.01   |

Supplementary Table 2. Comparison of clinical characteristics among the four cohorts of STAD patients used for somatic mutation, WGCNA, CNV and survival analyses respectively

|                                     | Age           | Gender            | Cancer stage      | Number of lymph nodes | Survival status   | Radiotherapy      | Targeted Therapy  | Microsatellite instability |
|-------------------------------------|---------------|-------------------|-------------------|-----------------------|-------------------|-------------------|-------------------|----------------------------|
|                                     |               | Male/female       | (I/II/III/IV)     |                       | Dead/alive        | Yes/no            | Yes/no            |                            |
| Dataset for mutation analysis (387) | 65.37±10.79   | 248/139           | 56/117/156/38     | 5.19±7.67             | 59/328            | 263/45            | 176/130           | 0.52±0.79                  |
| Dataset for WGCNA analysis (415)    | 65.83±10.75   | 265/150           | 57/123/171/41     | 5.68±8.58             | 79/336            | 262/54            | 171/142           | 0.53±0.8                   |
| Dataset for CNV analysis (441)      | 65.67±10.77   | 284/157           | 59/128/186/44     | 5.61±8.4              | 87/354            | 277/56            | 183/147           | 0.52±0.79                  |
| Dataset for survival analysis (378) | 66.07±10.89   | 244/134           | 50/119/163/34     | 5.41±7.36             | 73/305            | 253/47            | 165/132           | 0.52±0.79                  |
| Statistical results                 | P > 0.05      | P > 0.05          | P > 0.05          | P > 0.05              | P > 0.05          | P > 0.05          | P > 0.05          | P > 0.05                   |
|                                     | for all cases | for all cases     | for all cases     | for all cases         | for all cases     | for all cases     | for all cases     | for all cases              |
| Statistical method                  | T test        | Fisher exact test | Fisher exact test | T test                | Fisher exact test | Fisher exact test | Fisher exact test | T test                     |
